# Supplementary material
Source: PubMed Central journal article supplement (PMC4217426)
Supplement: pnas.201408206SI.pdf [file pnas.201408206SI.pdf]

# Supporting Information

Vollmer et al. 10.1073/pnas.1408206111

## NanoSIMS Analysis

It is well established from bulk isotopic measurements, mineralogical features, volatile contents, and other characteristics that organic materials in Renazzo-type (CR) chondrites are among the most primitive available for study (e.g., refs. 1 and 2). Antarctic Graves Nunataks (GRA) 95229 contains abundant and highly diverse organic materials (3, 4), and Northwest Africa (NWA) 852 has been shown to host anomalous organic  $^{15}\text{N}$ -rich grains despite the extensive aqueous alteration that has destroyed most of the presolar silicate stardust (5). Interplanetary dust particles (IDPs) are collected in the stratosphere, generally of low density and fine grained, and mostly  $<50\ \mu\text{m}$  in diameter. They are well known for their pristine components and presumably originate mostly from comets (e.g., refs. 6–10). Isotopically anomalous hot spots were detected by standard ion imaging techniques with the Cameca NanoSIMS ion probes (11) at the Carnegie Institution of Washington, DC, and the Max Planck Institut für Chemie in Mainz, Germany. This high spatial resolution ion probe uses a finely focused  $\text{Cs}^+$  primary beam to sputter negative secondary ions of H and D,  $^{12}\text{C}$  and  $^{13}\text{C}$ , or  $^{12}\text{C}^{14}\text{N}$  and  $^{12}\text{C}^{15}\text{N}$  together with reference isotopes ( $^{16}\text{O}$  and/or  $^{28}\text{Si}$ ) in multicollection mode. The ions sputtered from each position are detected in a double-focusing mass separator and converted to digitized ion images for each species. In calculated isotope ratio images, isotopically anomalous hot spots can be easily identified (Figs. S1–S4), and their ratios can be quantified with percent precision. Isotopic ratios of detected regions of interest are reported as  $\delta$  values, which are deviations from the terrestrial standard in ‰ units. Details of the analytical procedure can be found elsewhere (e.g., ref. 10).

All isotopic compositions reported here and in the literature are usually related to terrestrial compositions, i.e., the terrestrial atmosphere in the case of nitrogen and the terrestrial water in the case of hydrogen (Standard Mean Ocean Water). We now know from the results of NASA's Genesis mission that the Sun is depleted in  $^{15}\text{N}$  relative to the terrestrial atmosphere by  $\sim 380\%$  (12). Anomalous hot spots of the kind discussed here are then even more anomalous compared with the Sun.

## Scanning Electron Microscopy

Following NanoSIMS analysis, isotope hot spots were then relocated in a high-resolution scanning electron microscope (SEM) at the University of Manchester and the MPI in Mainz by comparing NanoSIMS ion images with the same areas in the SEM. As these hot spots of organic matter can be relatively large (up to 760 nm in this work) and may also stand out in secondary electron images by their darker contrast, they can be usually well distinguished from surrounding silicates, metal grains, and sulfides (Figs. S1–S4). The selection of relatively large organic grains for transmission electron microscopy (TEM) analysis may introduce a bias for inferred characteristics of organics. This is a typical problem for combined SIMS–TEM work because only large enough grains are usually chosen for focused ion beam (FIB) preparation. Furthermore, the areas scanned for isotopic hotspots in both CR chondrites and IDPs are vastly different because IDPs are much smaller than matrix areas in meteorites. This may introduce a sampling bias in our dataset as well.

## FIB Preparation

FIB preparations were performed on two different instruments: the two grains from GRA 95229 were prepared on a Zeiss CrossBeam EsB 1540 at the University of Münster, and the remaining grains were prepared on an FEI Helios NanoLab at the

Institute for Functional Materials of the University of Saarbrücken (Germany). To improve reidentification of targeted grains in later TEM analyses, a dedicated marking protocol was applied (13), where a small e-beam-deposited Pt cap is put on top of the areas of interest and a row of holes is shot into the surrounding material along the final line of thinning (Figs. S1–S4). Because organic matter is very prone to electron beam damage (14), electron beam exposure times of the grains in the final lamellae were reduced to a minimal amount. However, because FIB is a preparation technique which may induce artifacts into the final lamellae (e.g., amorphization, structural reorganization, and chemical modification), we cannot entirely exclude that some grains of interest may have been affected. As the relative inelastic mean free path (mfp) of electrons at the lower acceleration voltages as used by SuperSTEM increases compared with traditional high-voltage instruments (15), we thinned the sample down to less than 100 nm. In later EELS analyses, thicknesses of respective areas using the EELS-log-ratio technique (15) were around 1–1.5 mfp units (at 60 kV). During preparation of the FIB sections, some material from the grains was lost. The globular morphology of grain 13\_4 can still be identified, but only two small patches remained intact for analysis (Fig. S2). The same is true for grain 14\_2, where a small area of carbonaceous material was left on the bottom of the initial grain, protected from sputtering by higher Z material (Pt from the preparation) lying on top of it (Fig. S2). Material was also lost from the IDP organic grains, and we cannot be totally sure that the lamellae contain the anomalous grains of interest because organic grains are very small (Table S2). Still, we are confident that the measured carbonaceous grains are genetically connected to the isotopically anomalous grains of interest. EEL spectra of the IDP organic grains could still be recorded successfully (Fig. S5).

## UltraSTEM Investigations

Prepared lamellae were intentionally not documented previously in a conventional (200 kV) TEM before the measurements at the SuperSTEM Laboratory in Daresbury (UK) to avoid potential damage or contamination of the sample. We used a dedicated  $C_s$ - (spherical aberration coefficient) corrected Nion UltraSTEM 100 for sample analysis operating at 60 kV in gentle STEM conditions (16). Because this acceleration voltage is below the knock-on threshold for carbon ( $\sim 80$  kV), any damage to the regions of interest by these effects could be eliminated. The probe current (down to below 10 pA in the most sensitive samples) and dwell times (fast scanning times and cumulative imaging at low dose rates) were further tailored to obtain electron doses low enough to avoid any observable beam damage. The vacuum system allows for near-ultrahigh-vacuum conditions near the specimen, thus preventing sample contamination through spurious carbon buildup or chemical etching due to residual gases in the column. The instrument is equipped with a cold field emission electron source with a nominal energy spread of around 0.3 eV, a quadrupole-octupole  $C_s$ -corrector in the condenser system allowing for correction of up to sixfold astigmatism and sub-Ångström resolution, an ultrastable stage, conventional bright-field (BF) and high-angle annular darkfield (HAADF) detectors, and a Gatan Enfina EEL spectrometer. The probe forming optics were adjusted to provide a 0.11-nm probe with a beam convergence of 30 mrad (half-angle), whereas collection half-angles of 36 mrad (for high collection efficiency) or 24 mrad (for high energy resolution) were chosen for EELS analysis. The energy loss



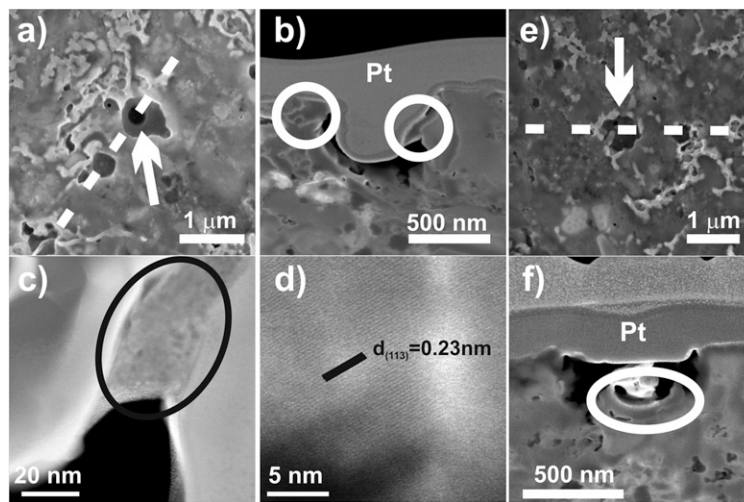

**Fig. S2.** SEM-UltraSTEM images of organic grains 13\_4 and 14\_2 from the CR chondrite GRA 95229. (A) Grain 13\_4 within the matrix (marked by arrow) with the distinct globular morphology and the direction of the FIB section indicated. (B) SEM image of the remaining material of grain 13\_4 in the final FIB section encircled. The Pt strap is located on top and has filled up the hollow nanoglobular morphology of the grain. (C) HAADF overview image of the remaining material of grain 13\_4 (encircled) with distinct mottled contrast due to crystalline inclusions. (D) HR image of 13\_4 with lattice fringes of nanocrystals which can be assigned to calcite  $d$  values. (E) Grain 14\_2 within the matrix (marked by arrow) and the direction of the FIB section indicated. It exhibits a more blocky appearance. (F) SEM image of the remaining material of grain 14\_2 in the final FIB section encircled.

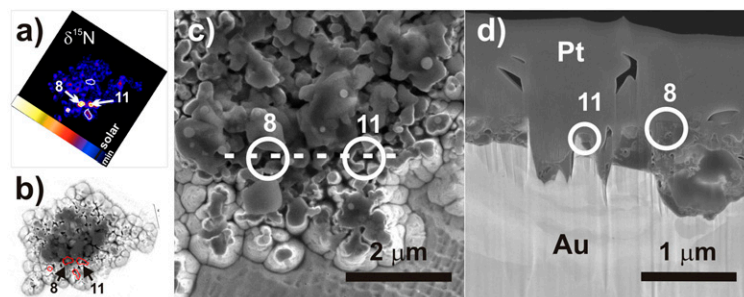

**Fig. S3.** NanoSIMS and SEM images of organic grains in IDP AK5. (A) NanoSIMS ion ratio image (size  $10 \times 10 \mu\text{m}^2$ , rotated to fit orientation of SEM image) of  $\delta^{15}\text{N}$  with grains 08 and 11 (both  $^{15}\text{N}$ -enriched) clearly visible above the solar system background (together with some other hot spots within the same particle). (B) SEM image of the particle with the outlines of the anomalies put over the image to relocate respective grains. (C) Detail SEM image of the particle with grains 8 and 11 encircled and the location of the FIB lamella indicated by a dotted line. (D) SEM image of the FIB section with grains 8 and 11 encircled and sandwiched between the Pt cover at the top and the Au substrate at the bottom (reversed view).

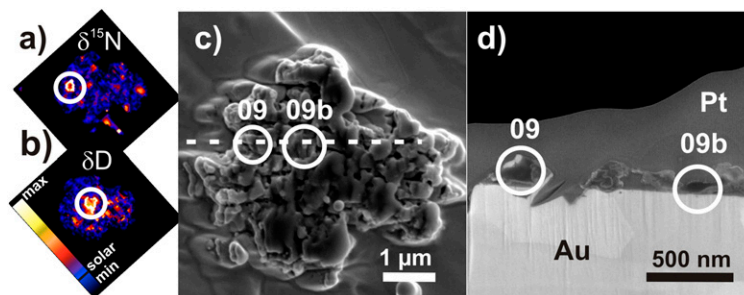

**Fig. S4.** NanoSIMS and SEM images of organic grains in IDP AK6. (A and B) NanoSIMS ion ratio images (size  $10 \times 10 \mu\text{m}^2$  each, rotated to fit orientation of SEM images) of  $\delta^{15}\text{N}$  (A) and  $\delta\text{D}$  (B) in IDP AK6 with color-coded bar. Grains 09 ( $^{15}\text{N}$ -enriched) and 09b (D-enriched) are clearly visible above the solar system background. (C) The approximate location of the two grains within the IDP with the direction of the FIB lamella indicated. (D) SEM image of the FIB section with the two grains encircled and sandwiched between the Pt strap at the top and the Au substrate at the bottom.

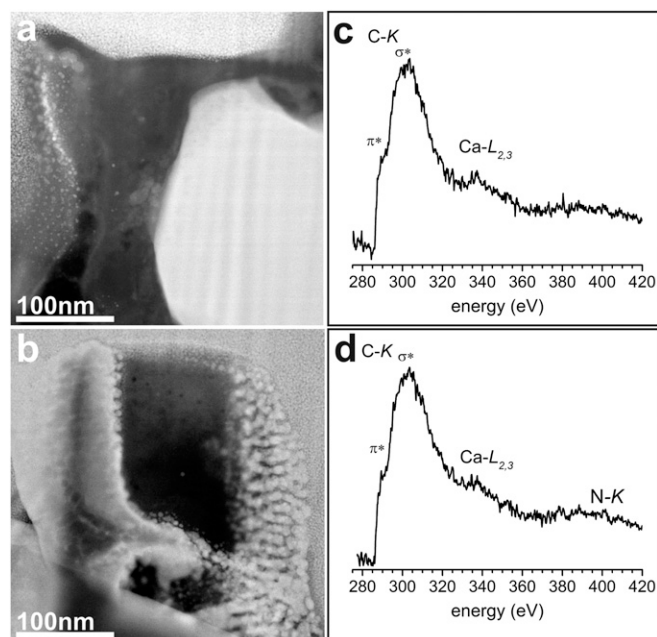

**Fig. S5.** UltraSTEM images and EEL spectra over the whole energy range of organic grains 8 and 11 from the IDP AK5. (A) HAADF overview image of the irregular grain 8. (B) HAADF overview image of the blocky grain 11. (C and D) Extracted EEL spectra of organic grains 8 (C) and 11 (D) with distinct edges marked. The N–K edge could be detected in grain 11 but is very noisy. The Ca–L<sub>2,3</sub> lines are visible in EEL spectra from both grains.

**Table S1. Overview of identified EELS fine structure and associated functional group chemistry in isotopically anomalous organic grains**

| Identified energy band, eV | Functional group                                       | Identified in grain no.                                               |
|----------------------------|--------------------------------------------------------|-----------------------------------------------------------------------|
| Carbon K                   |                                                        |                                                                       |
| 285 (A)                    | Aromatic C = C                                         | All grains                                                            |
| 286.3–286.8 (B)            | Aldehyde O = CH<br>Ketone C = O<br>Nitrile C≡N         | All grains                                                            |
| 287.2–288.3 (C)            | Aliphatic C–C                                          | All IDP grains                                                        |
| 288.5–288.7 (D)            | Carboxyl O = C–O                                       | GRA 95229: grain 14_2                                                 |
| 290.3 (E)                  | Carbonate CO <sub>3</sub>                              | GRA 95229: both grains                                                |
| Nitrogen K                 |                                                        |                                                                       |
| 398.8/399.7–399.9          | Imine C = N/ Nitrile C≡N                               | NWA 852: grains 2_24a+b<br>GRA 95229: grain 13_4<br>IDP AK5: grain 11 |
| 402.2–402.4                | Pyrrole C <sub>4</sub> H <sub>4</sub> NH               | NWA 852: grains 2_24a+b                                               |
| 399.9, 402.3, 406.8, 411.4 | Imidazole C <sub>3</sub> H <sub>4</sub> N <sub>2</sub> | NWA 852: grains 2_24a+b                                               |

**Table S2. Overview of isotopic compositions and sizes of isotopically anomalous organic grains**

| Grain                | δ <sup>15</sup> N, ‰ | δD, ‰      | δ <sup>13</sup> C, ‰ | Size (SEM), nm | Size (FIB), nm |
|----------------------|----------------------|------------|----------------------|----------------|----------------|
| NWA852_2_24a         | 430 ± 15             | n.m.       | 20 ± 10              | 630 × 570      | 590 × 210      |
| NWA852_2_24b         | 360 ± 10             | n.m.       | –10 ± 10             | 490 × 300      | 400 × 100      |
| GRA95229_13_4        | 680 ± 10             | n.m.       | 30 ± 10              | 760 × 630      | 190 × 60       |
| GRA95229_14_2        | 770 ± 30             | n.m.       | –110 ± 10            | 690 × 650      | 390 × 70       |
| IDP AK5 hot spot 08  | 1200 ± 60            | 0          | 30 ± 10              | 360 × 340      | 180 × 60       |
| IDP AK5 hot spot 11  | 1230 ± 90            | n.m.       | 0                    | 440 × 280      | 80 × 60        |
| IDP AK6 hot spot 09  | 1520 ± 240           | 0          | 0                    | 200 × 190      | 150 × 150      |
| IDP AK6 hot spot 09b | 0                    | 5600 ± 500 | 10 ± 20              | 540 × 380      | 270 × 60       |

n.m., not measured.
